# Supplementary material
Source: MDPI journal article supplement (https://www.mdpi.com/1424-8247/14/11/1112)
Supplement: s1 [file s1]

## Supplement material

### Data S1. Spectroscopic data of CIN-RM structure.

$^1\text{H}$ -NMR ( $\text{CDCl}_3$ , 400 MHz)  $\delta$  in ppm: 7.81 (1H, d,  $J = 16.0$  Hz,  $\text{CH}=\text{CH}_\beta$ ), 7.62 (2H, m, H-3' and H-5'), 7.46 (3H, m, H-2', H-6', and H-4'), 6.67 (1H, d,  $J = 16.0$  Hz,  $\text{CH}_\alpha=\text{CH}$ ), 6.01 (1H, qq,  $J = 7.4, 1.2$  Hz, H-26), 5.79 (1H, s, OH-8), 4.54 (1H, d,  $J = 11.2$  Hz, H-22b), 4.34 (1H, br t,  $J = 4.0$  Hz, H-1), 4.13 (1H, d,  $J = 2.0$  Hz, H-21), 4.07 (1H, dd,  $J = 11.2, 4.0$  Hz, H-22a), 3.99 (1H, br d,  $J = 3.6$  Hz, H-11), 3.85 (3H, s, 17- $\text{OCH}_3$ ), 3.80 (3H, s, 7- $\text{OCH}_3$ ), 3.36 (1H, dt,  $J = 7.2, 2.0$  Hz, H-13), 3.22 (1H, d,  $J = 12.0$  Hz, H-3), 2.74 (1H, dd,  $J = 20.8, 7.2$  Hz, H-14 $\alpha$ ), 2.60 (1H, dd,  $J = 14.0, 2.0$  Hz, H-4 $\alpha$ ), 2.29 (1H, d,  $J = 20.8$  Hz, H-14 $\beta$ ), 2.25 (3H, s, 12- $\text{NCH}_3$ ), 2.12 (3H, s, 6- $\text{CH}_3$ ), 1.89 (3H, dq,  $J = 7.2, 1.4$  Hz, H<sub>3</sub>-27), 1.90 (3H, s, 16- $\text{CH}_3$ ), 1.72 (3H, dq,  $J = 1.4, 1.2$  Hz, H<sub>3</sub>-28), 1.66 (1H, overlapped, H-4 $\beta$ );  $^{13}\text{C}$ -NMR ( $\text{CDCl}_3$ , 100 MHz)  $\delta$  in ppm: 186.0 (C, C-15), 182.6 (C, C-18), 167.1 (C, C-24), 164.7 (C, 5- $\text{OC}=\text{O}$ ), 155.5 (C, C-17), 146.8 (CH,  $\text{CH}=\text{CH}_\beta$ ), 143.8 (C, C-7), 143.1 (C, C-8), 141.5 (C, C-20), 140.0 (CH, C-26), 139.1 (C, C-5), 135.7 (C, C-19), 134.1 (C, C-1'), 131.0 (CH, C-4'), 129.1 (CH, C-2' and C-6'), 128.8 (C, C-16), 128.4 (CH, C-3' and C-5'), 126.8 (C, C-25), 124.5 (C, C-10), 122.6 (C, C-6), 117.6 (C, 21-CN), 117.2 (C, C-9), 116.4 (CH,  $\text{CH}_\alpha=\text{CH}$ ), 64.5 ( $\text{CH}_2$ , C-22), 61.2 ( $\text{CH}_3$ , 7- $\text{OCH}_3$ ), 60.6 ( $\text{CH}_3$ , 17- $\text{OCH}_3$ ), 59.5 (CH, C-21), 56.5 (CH, C-1), 55.3 (CH, C-3), 54.9 (CH, C-13), 54.6 (CH, C-11), 41.5 ( $\text{CH}_3$ , 12- $\text{NCH}_3$ ), 27.8 ( $\text{CH}_2$ , C-4), 21.1 ( $\text{CH}_2$ , C-14), 20.6 ( $\text{CH}_3$ , C-28), 15.9 ( $\text{CH}_3$ , C-27), 10.1 ( $\text{CH}_3$ , 6- $\text{CH}_3$ ), 8.6 ( $\text{CH}_3$ , 16- $\text{CH}_3$ ).
